# Supplementary material for: Serum Endocannabinoid and Mood Changes after Exercise in Major Depressive Disorder
Source: PubMed Central journal article supplement — Med Sci Sports Exerc. 2019 Aug 14;51(9):1909–17. doi: 10.1249/MSS.0000000000002006 (PMC6727944; doi:10.1249/mss.0000000000002006), 2019-08-14
Supplement: mss-51-1909-s001.pdf [file mss-51-1909-s001.pdf]

**Supplemental Digital Content 1**

Log endocannabinoid and related lipid changes based on antidepressant usage

| <b>Not taking antidepressants (n=8)</b> |      |                 |             |                         |                  |             |                         |
|-----------------------------------------|------|-----------------|-------------|-------------------------|------------------|-------------|-------------------------|
|                                         |      | <b>Moderate</b> |             |                         | <b>Preferred</b> |             |                         |
|                                         |      | <b>Pre</b>      | <b>Post</b> | <b>Cohen's <i>d</i></b> | <b>Pre</b>       | <b>Post</b> | <b>Cohen's <i>d</i></b> |
| <b>AEA</b>                              | Mean | 0.154           | 0.247       | 0.58                    | 0.216            | 0.255       | 0.28                    |
|                                         | SD   | 0.155           | 0.164       |                         | 0.145            | 0.133       |                         |
| <b>2-AG</b>                             | Mean | 1.680           | 1.610       | -0.25                   | 1.680            | 1.650       | -0.12                   |
|                                         | SD   | 0.260           | 0.290       |                         | 0.290            | 0.210       |                         |
| <b>OEA</b>                              | Mean | 0.827           | 0.900       | 0.41                    | 0.893            | 0.923       | 0.17                    |
|                                         | SD   | 0.179           | 0.180       |                         | 0.166            | 0.186       |                         |
| <b>PEA</b>                              | Mean | 0.13            | 0.134       | 0.03                    | 0.196            | 0.153       | -0.39                   |
|                                         | SD   | 0.178           | 0.131       |                         | 0.086            | 0.133       |                         |
| <b>2-OG</b>                             | Mean | 3.100           | 3.070       | -0.09                   | 3.030            | 3.033       | 0.01                    |
|                                         | SD   | 0.333           | 0.353       |                         | 0.272            | 0.221       |                         |
| <b>Taking antidepressants (n=9)</b>     |      |                 |             |                         |                  |             |                         |
|                                         |      | <b>Moderate</b> |             |                         | <b>Preferred</b> |             |                         |
|                                         |      | <b>Pre</b>      | <b>Post</b> | <b>Cohen's <i>d</i></b> | <b>Pre</b>       | <b>Post</b> | <b>Cohen's <i>d</i></b> |
| <b>AEA</b>                              | Mean | 0.204           | 0.283       | 0.57                    | 0.255            | 0.272       | 0.12                    |
|                                         | SD   | 0.165           | 0.112       |                         | 0.150            | 0.129       |                         |
| <b>2-AG</b>                             | Mean | 1.730           | 1.639       | -0.39                   | 1.759            | 1.645       | -0.58                   |
|                                         | SD   | 0.270           | 0.196       |                         | 0.175            | 0.215       |                         |
| <b>OEA</b>                              | Mean | 0.913           | 0.969       | 0.45                    | 0.946            | 0.951       | 0.04                    |
|                                         | SD   | 0.134           | 0.113       |                         | 0.150            | 0.132       |                         |
| <b>PEA</b>                              | Mean | 0.282           | 0.279       | -0.01                   | 0.254            | 0.203       | -0.46                   |
|                                         | SD   | 0.258           | 0.204       |                         | 0.124            | 0.099       |                         |
| <b>2-OG</b>                             | Mean | 3.170           | 3.090       | -0.33                   | 3.170            | 3.070       | -0.38                   |
|                                         | SD   | 0.200           | 0.289       |                         | 0.236            | 0.286       |                         |

*Note:* Units are pmol/ml. Abbreviations: SD = standard deviation; AEA = *N*-arachidonoyl ethanolamine; 2-AG = 2-arachidonoyl glycerol; PEA = palmitoylethanolamine; OEA = oleoylethanolamine; 2-OG = 2-oleoyl glycerol.
