# Supplementary figures and images for: Serum Endocannabinoid and Mood Changes after Exercise in Major Depressive Disorder
Source: PubMed Central journal article supplement — Med Sci Sports Exerc. 2019 Aug 14;51(9):1909–17. doi: 10.1249/MSS.0000000000002006 (PMC6727944; doi:10.1249/mss.0000000000002006), 2019-08-14

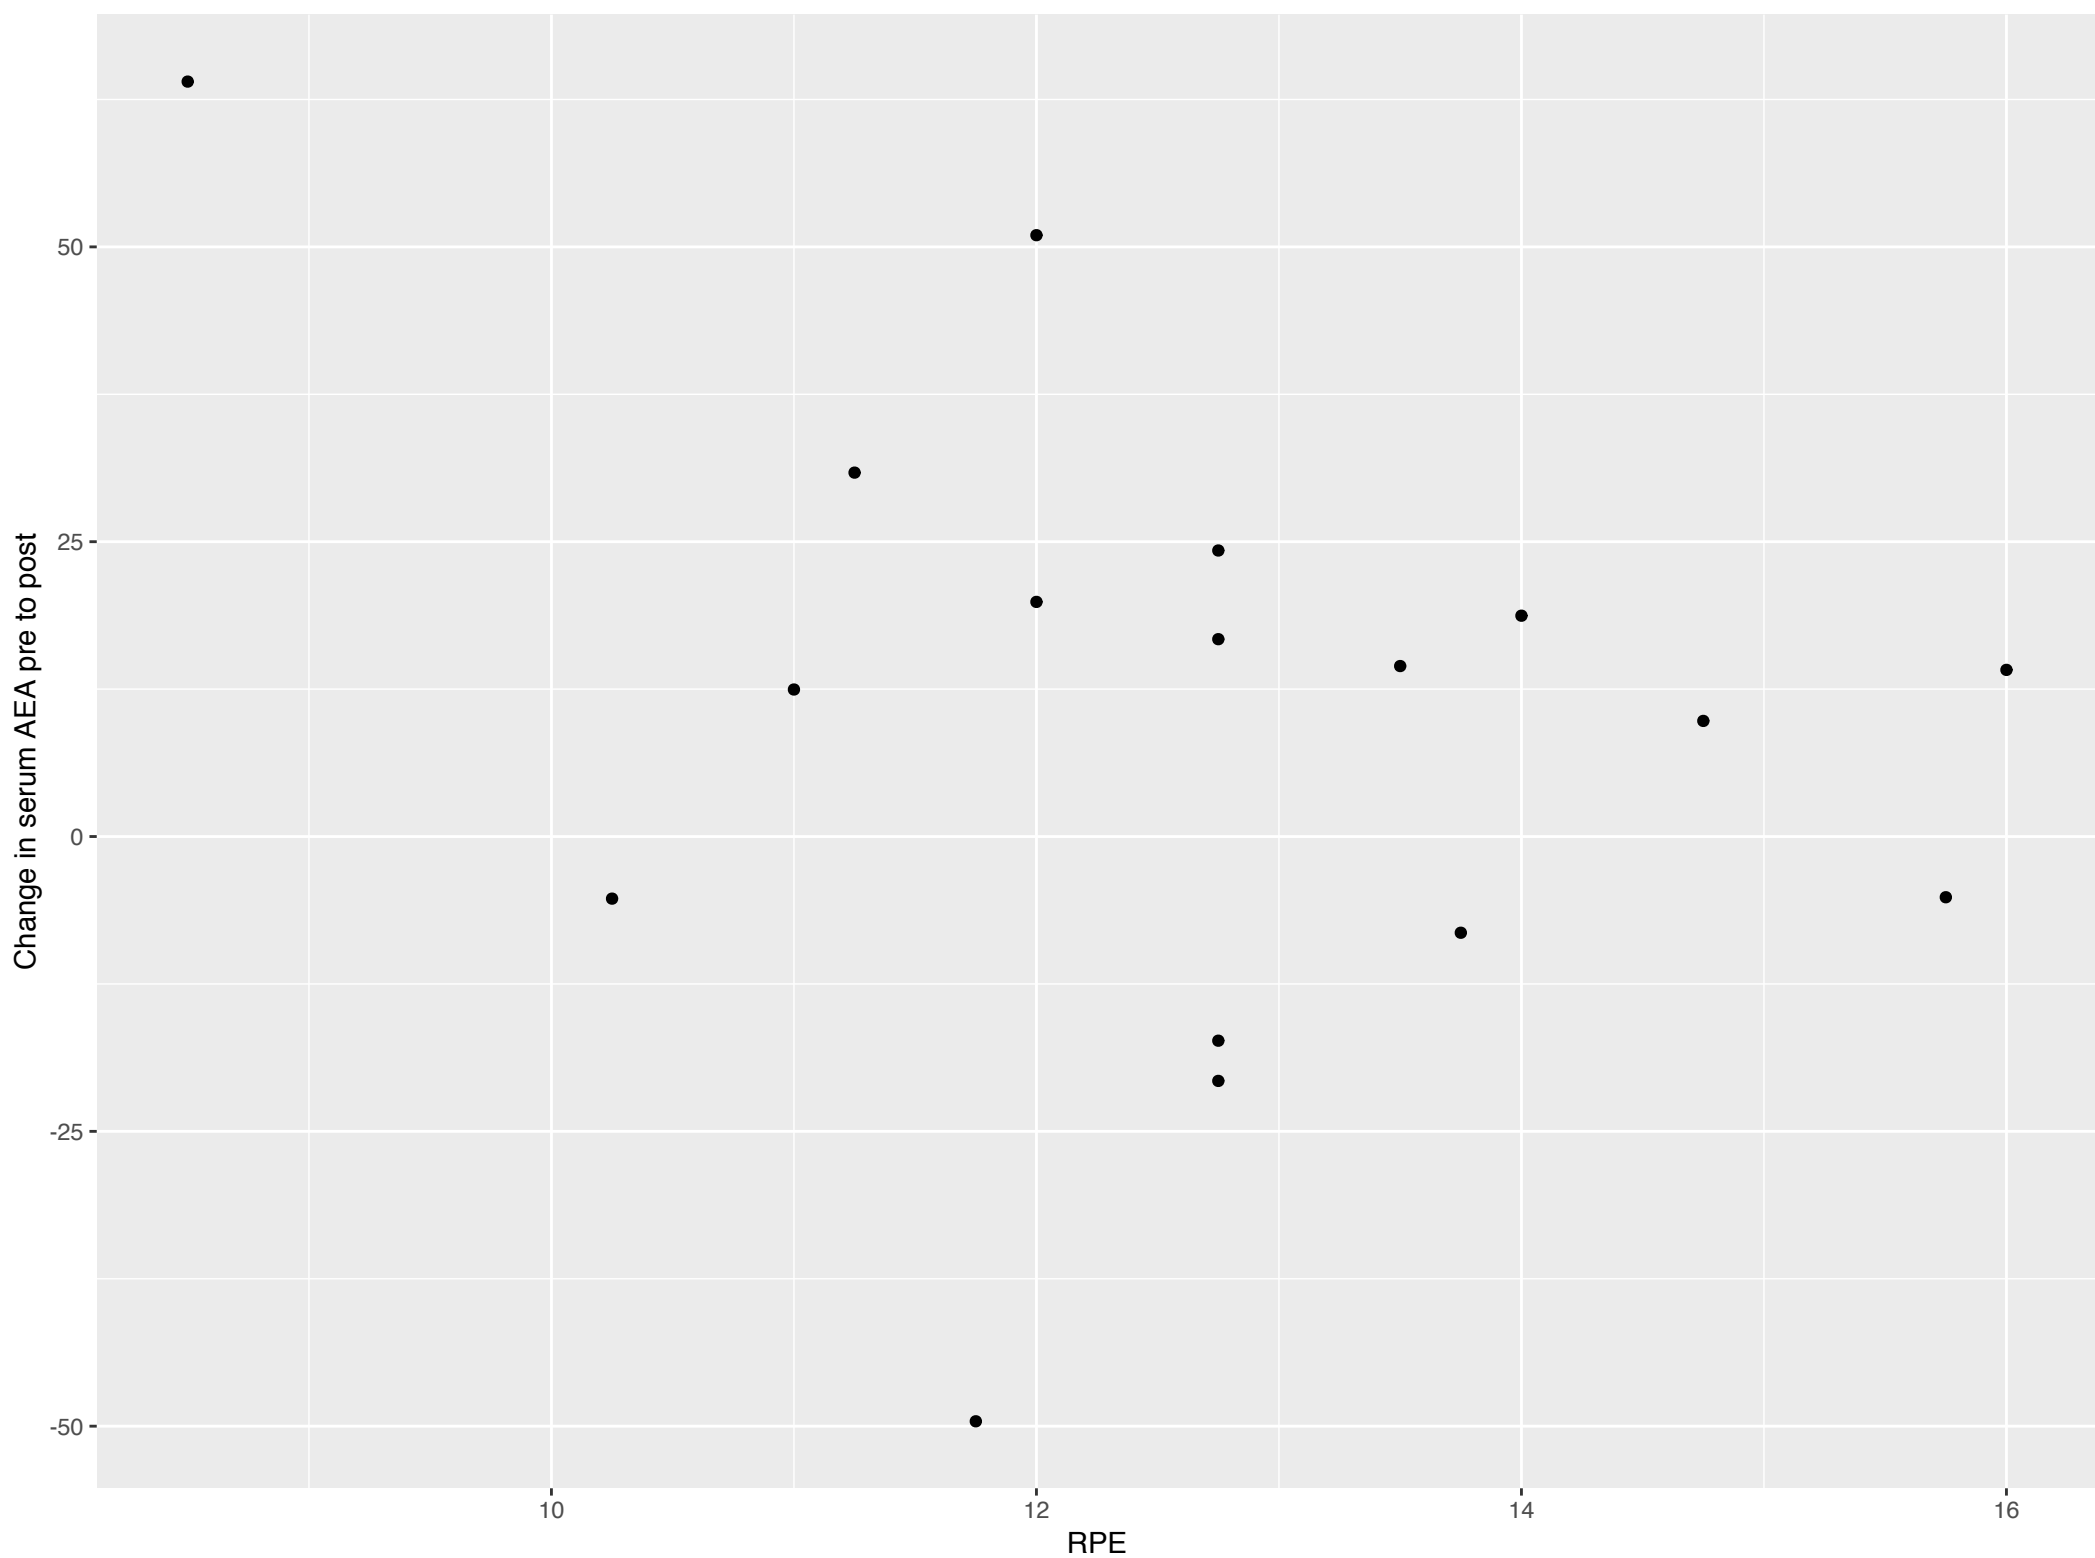

**Supplemental Digital Content 3: Average RPE across preferred session and change in AEA.**

Supplement: mss-51-1909-s002.pdf [file mss-51-1909-s002.pdf]

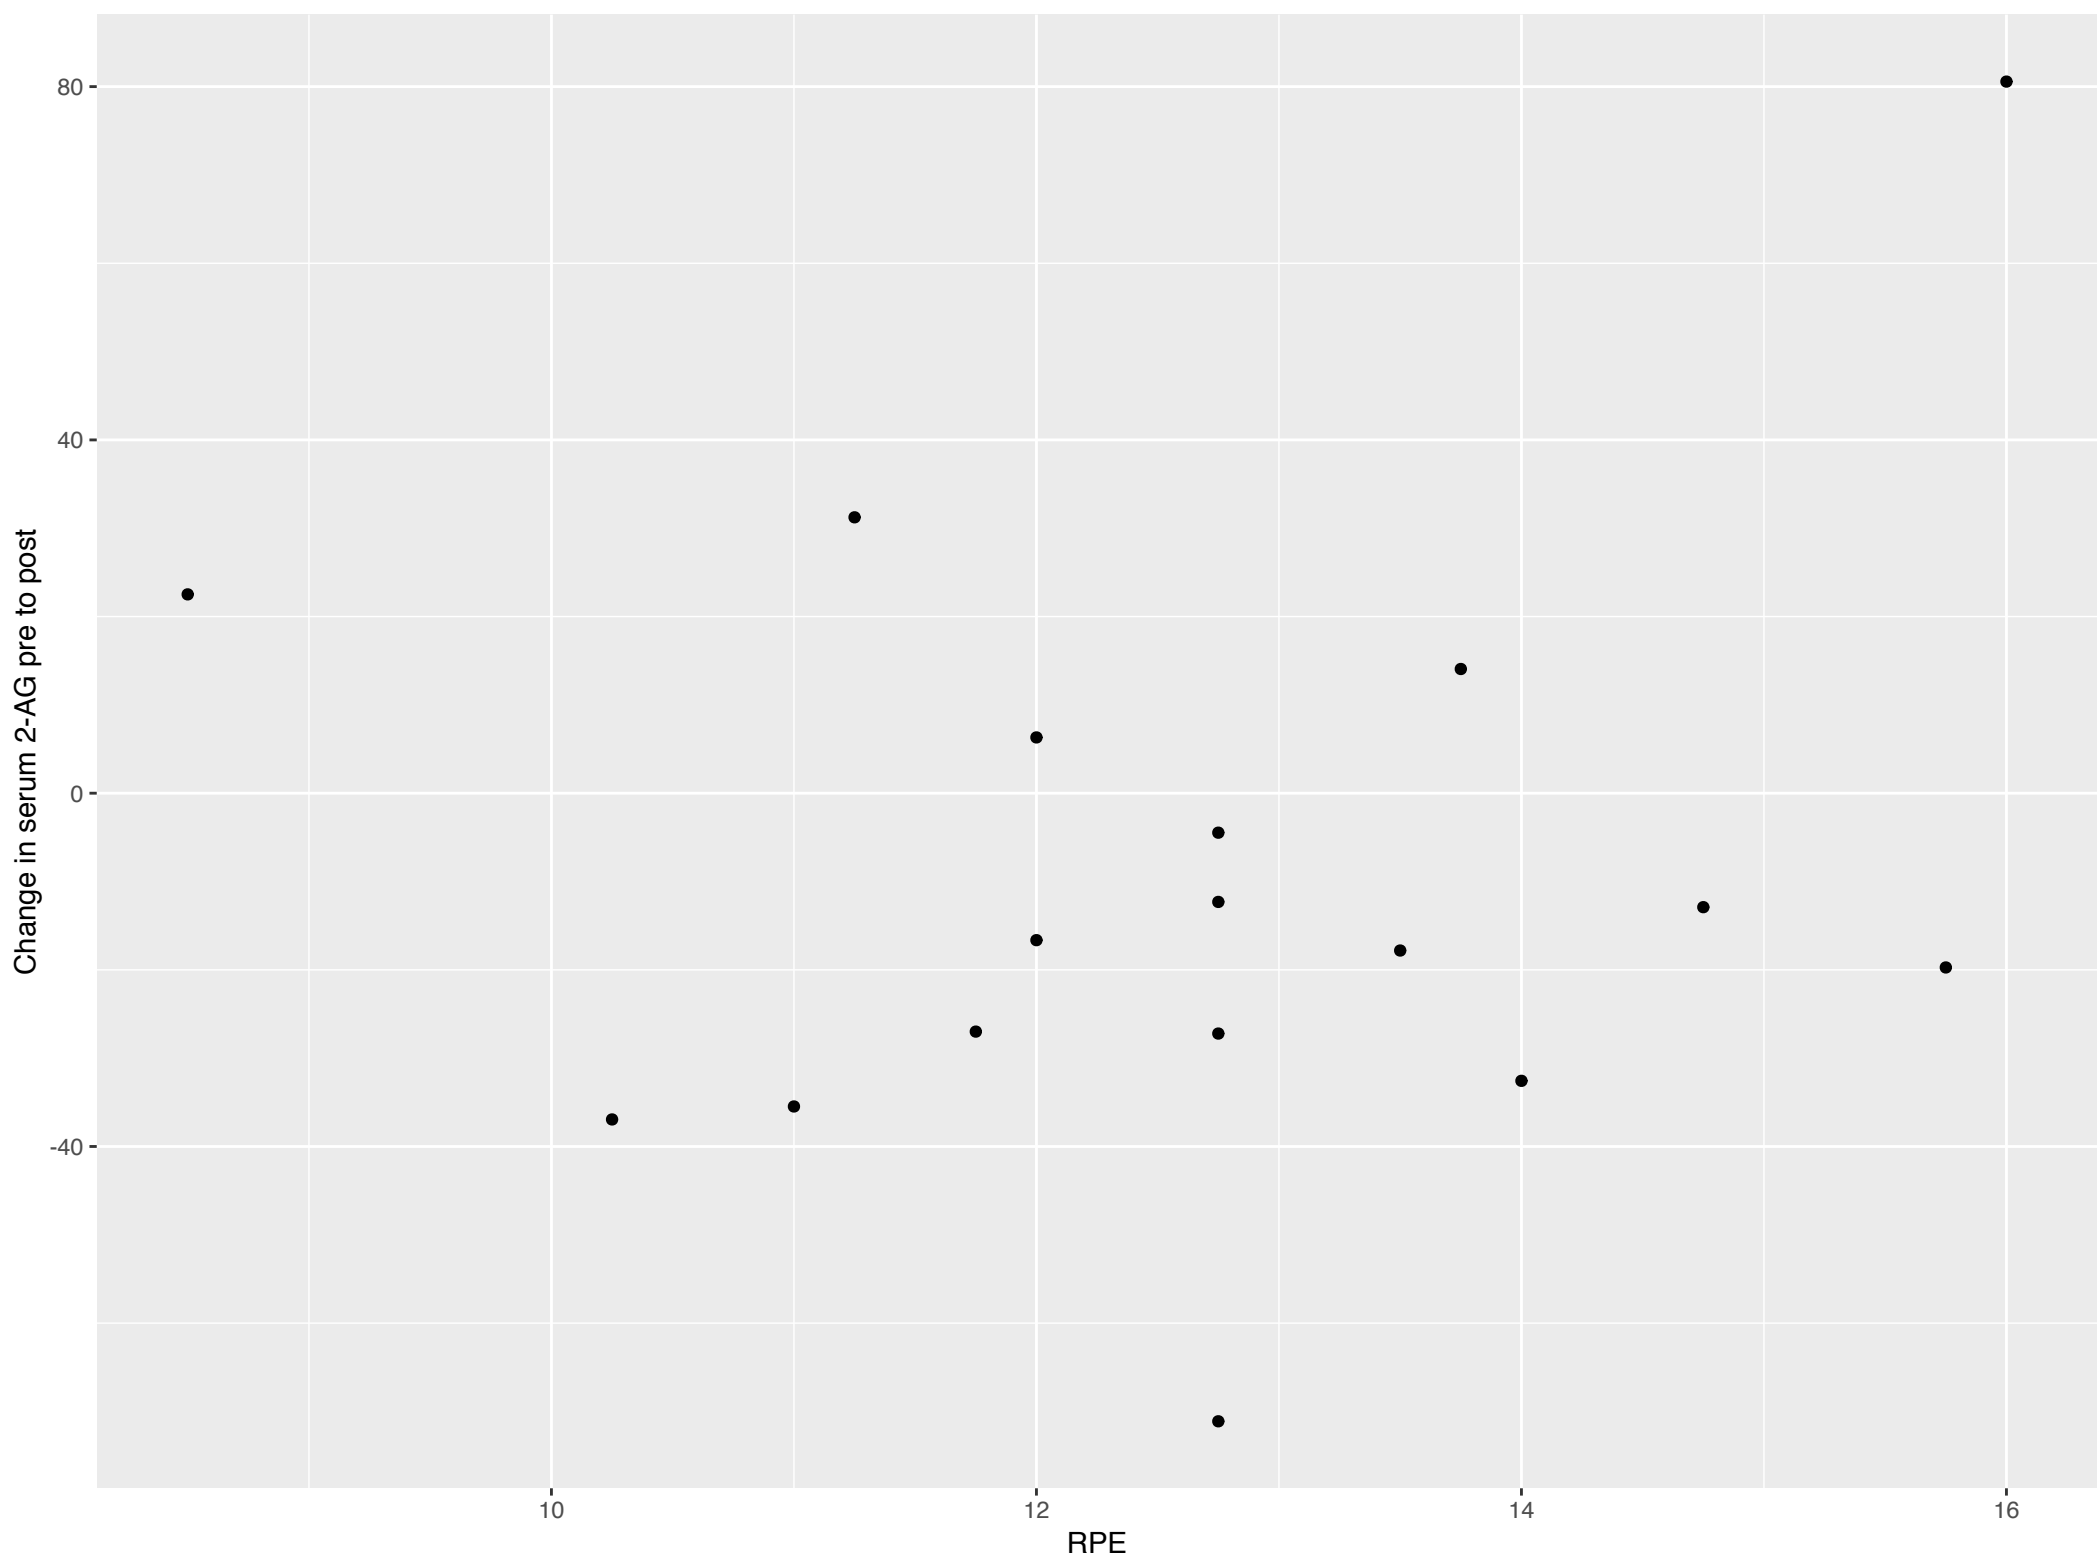

**Supplemental Digital Content 2: Average RPE across preferred session and change in 2-AG.**

Supplement: mss-51-1909-s003.pdf [file mss-51-1909-s003.pdf]
